# Supplementary material for: Perlecan, a heparan sulfate proteoglycan, regulates systemic metabolism with dynamic changes in adipose tissue and skeletal muscle
Source: PubMed Central journal article supplement (PMC5958100; doi:10.1038/s41598-018-25635-x), 2018-05-17

# **Perlecan, a heparan sulfate proteoglycan, regulates systemic metabolism with dynamic changes in adipose tissue and skeletal muscle**

Yuri Yamashita<sup>1,2</sup>, Satoshi Nakada<sup>3</sup>, Toshinori Yoshihara<sup>4</sup>, Takeshi Nara<sup>5</sup>, Norihiko Furuya<sup>2</sup>, Takashi Miida<sup>6</sup>, Nobutaka Hattori<sup>2</sup>, and Eri Arikawa-Hirasawa<sup>1,2,\*</sup>

<sup>1</sup>Aging Biology in Health and Disease, <sup>2</sup>Department of Neurology, and <sup>6</sup>Department of Clinical Laboratory medicine, Juntendo University Graduate School of Medicine, Tokyo 113-8421, Japan. <sup>3</sup>Japanese Center for Research on Women in Sport and <sup>4</sup>Department of Exercise Physiology, Juntendo University Graduate School of Health and Sports Science, Chiba 270-1695, Japan. <sup>5</sup>Faculty of Pharmacy, Iwaki Meisei University, Fukushima 970-8551, Japan.

\*Correspondence and requests for materials should be addressed to E.AH.

*Eri Arikawa-Hirasawa: at: Juntendo University Faculty of Medicine, Research Institute for Disease of Old Age, Building 10, Room 606, 2-1-1 Hongo, Bunkyo-ku, Tokyo 113-8421, Japan (email: ehirasaw@juntendo.ac.jp)*

## **SUPPLEMENTARY INFORMATION**

Supplementary information contains

Supplementary Figure legend & Supplementary Figure 1, 2

## **Supplementary Figure legend**

**Supplementary Figure 1:** Full length gels and western blot displayed in Figure 5a and 5f.

**Supplementary Figure 2:** The size of each adipocyte in Figure 2c and 2d was re-plotted (mean  $\pm$  S.D., n = 3,000-4,000 cells). Data were analyzed by two-way ANOVA with Sidak's multiple comparison. \*\*\*\* $p < 0.0001$ .

**Full length gel of MHC isoforms electrophoresis in Figure 5a**

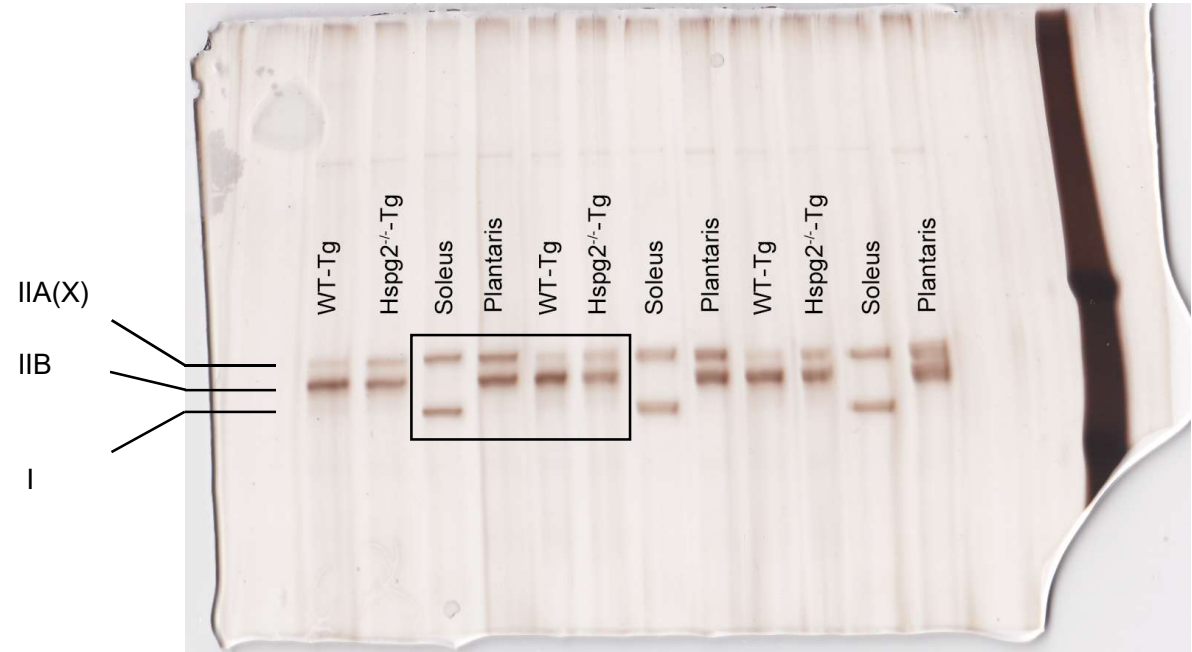

**Full length blots in Figure 5f**

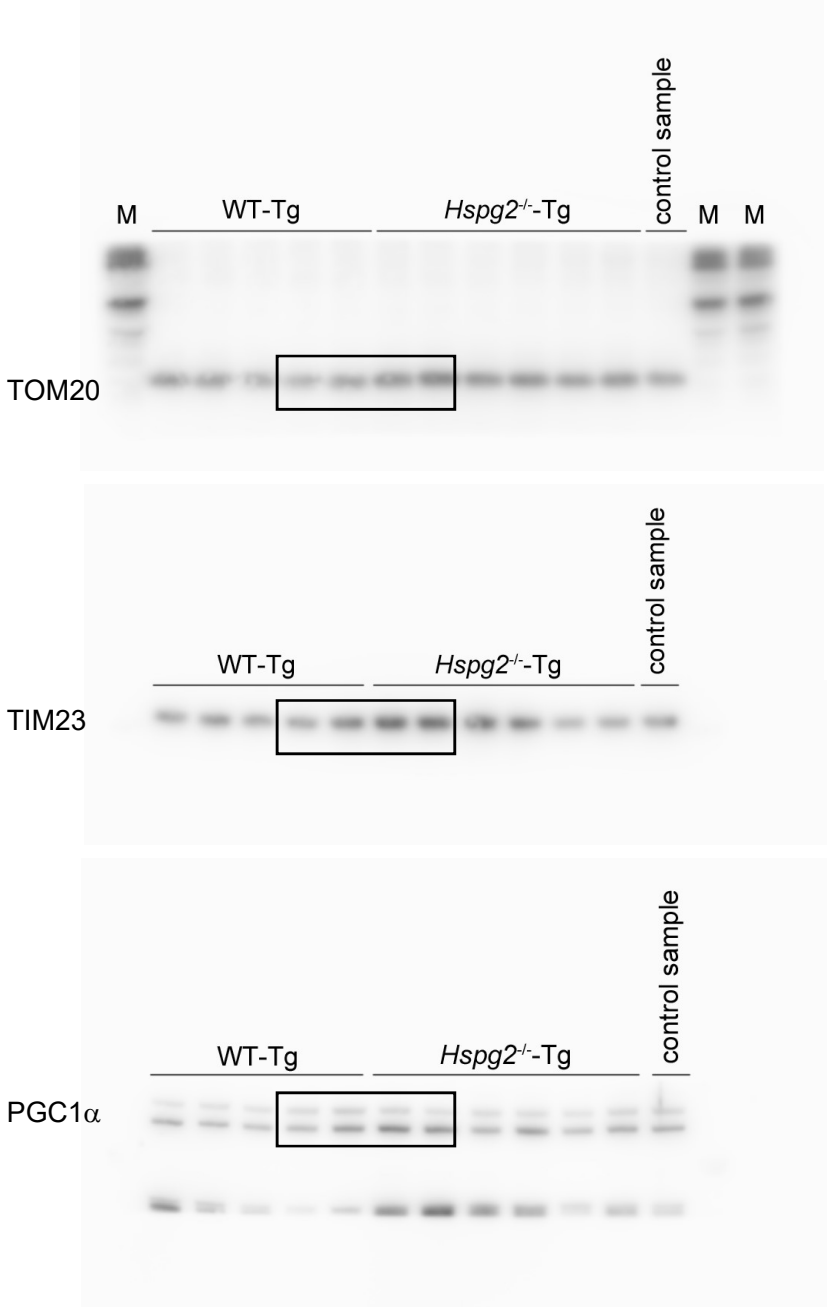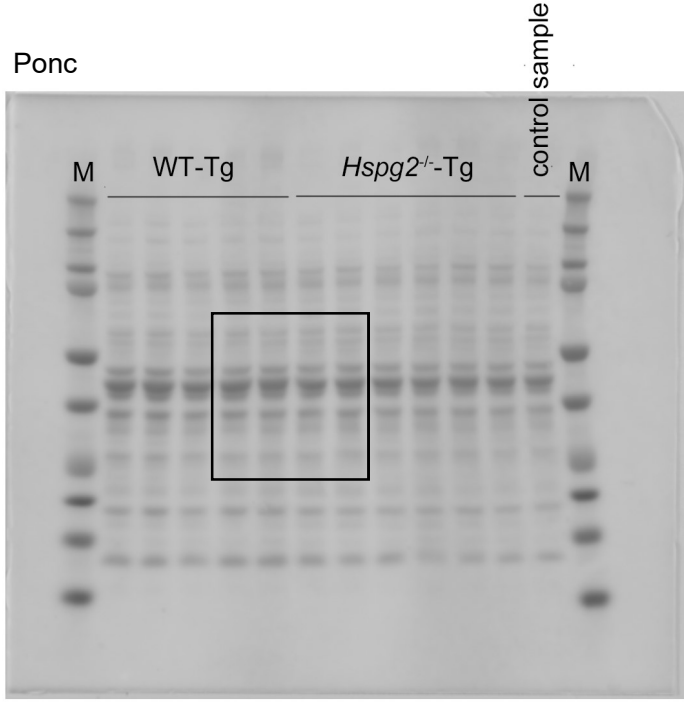

# Adipocyte Area

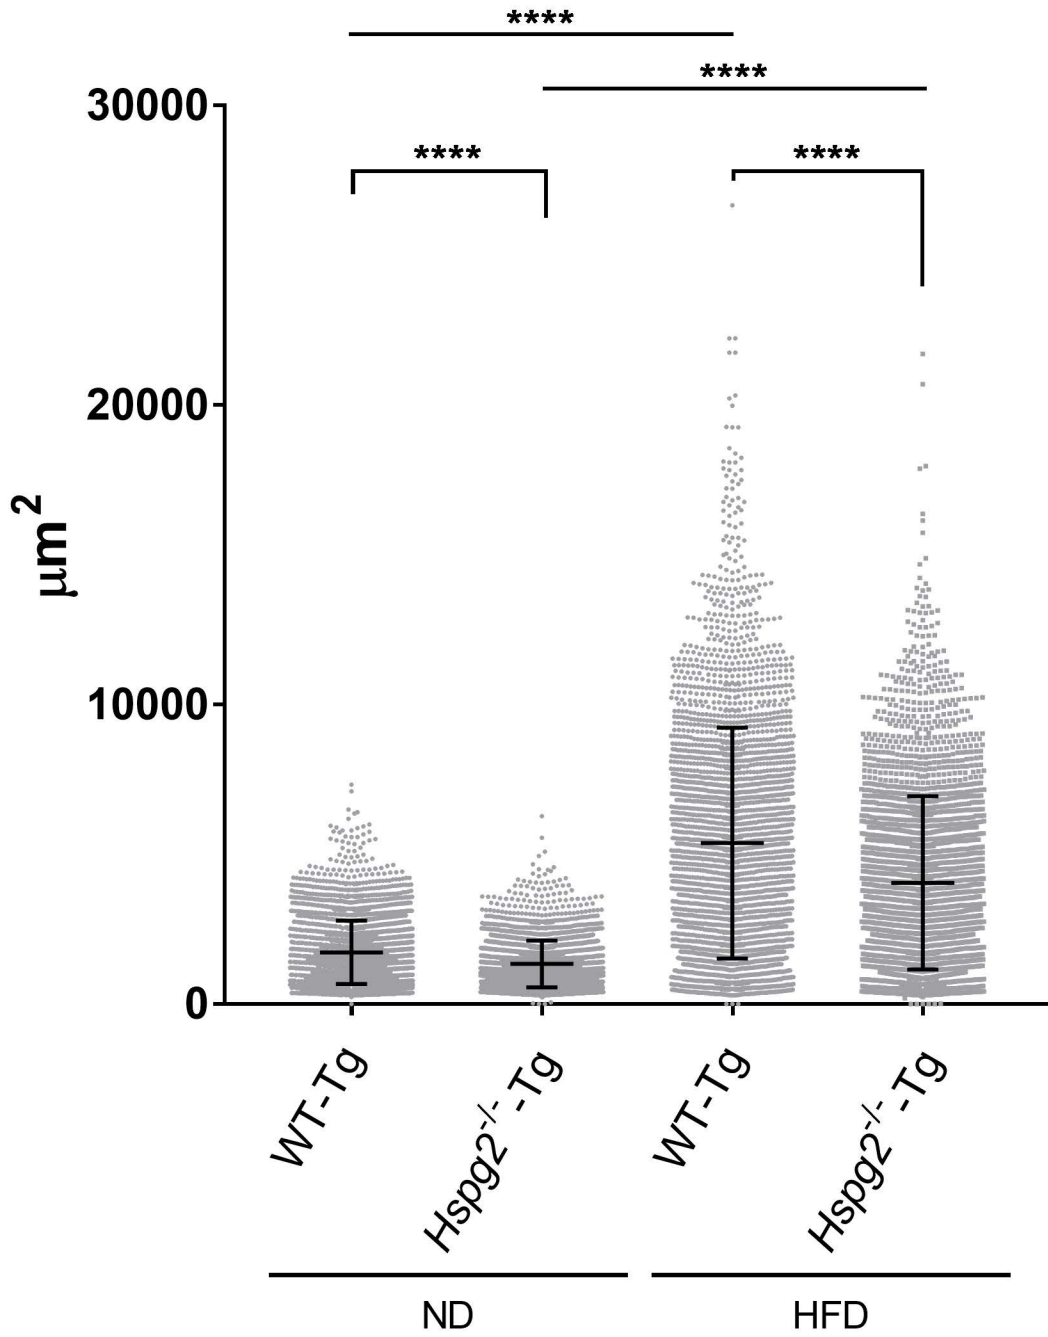

Supplement: 41598_2018_25635_MOESM1_ESM.pdf [file 41598_2018_25635_MOESM1_ESM.pdf]
